# Supplementary material for: Interdisciplinary Mobile Health Model to Improve Clinical Care After Heart Transplantation: Implementation Strategy Study
Source: PubMed Central journal article supplement (PMC7723747; doi:10.2196/19065), 2020-11-24
Supplement: cardio_v4i1e19065_app3.pdf [file cardio_v4i1e19065_app3.pdf]

## Multimedia Appendix 3

### Main areas for improvement in mHeart Prototype 1 as a result of user feedback during

#### Alpha testing

| <b>General Settings</b>                   |                                                                                                                                                                                                                                                                                                                                                                                                                                                                                                                                                                                                                                                          |
|-------------------------------------------|----------------------------------------------------------------------------------------------------------------------------------------------------------------------------------------------------------------------------------------------------------------------------------------------------------------------------------------------------------------------------------------------------------------------------------------------------------------------------------------------------------------------------------------------------------------------------------------------------------------------------------------------------------|
| Patient                                   | <ul style="list-style-type: none"><li>- Improve visualization of the menu login button.</li><li>- Provide direct messaging for contacting the developer's technical team.</li></ul>                                                                                                                                                                                                                                                                                                                                                                                                                                                                      |
| Provider                                  | <ul style="list-style-type: none"><li>- Adapt the Web to a responsive design.</li><li>- Modify the user password every 3 months by an automatic message.</li><li>- Avoid manual input of patient data on discharge.</li><li>- Supply the legal conditions of use that the patient accepts.</li><li>- Decrease the number of seconds needed to access the app.</li><li>- Multi-device access to the patient's app (e.g. if caregivers need to be included).</li><li>- Include a provider monitoring section from which vital signs registered in follow-up (blood pressure or analytical data) can be consulted and downloaded in Excel format.</li></ul> |
| <b>Personal and Clinical Data Module</b>  |                                                                                                                                                                                                                                                                                                                                                                                                                                                                                                                                                                                                                                                          |
| Patient                                   | <ul style="list-style-type: none"><li>- Provide health professional job profiles in the clinical team list. The profile also would be visible when the patient selects the recipient of a message (e.g. Name Surname - Pharmacist).</li></ul>                                                                                                                                                                                                                                                                                                                                                                                                            |
| Provider                                  | <ul style="list-style-type: none"><li>- Include a summary heading with each patient's main data, together with a photograph.</li><li>- Consult the information recorded by a patient in the clinical history available in any center in the health area.</li></ul>                                                                                                                                                                                                                                                                                                                                                                                       |
| <b>Treatment Module</b>                   |                                                                                                                                                                                                                                                                                                                                                                                                                                                                                                                                                                                                                                                          |
| Patient                                   | <ul style="list-style-type: none"><li>- Consult with the heart transplant team about any incompatibility with courses of treatment prescribed by other providers in the health area.</li><li>- Facilitate queries referring to other complementary treatments.</li><li>- Retrospectively validate drug intake and allow multiple validations at the same time.</li></ul>                                                                                                                                                                                                                                                                                 |
| Provider                                  | <ul style="list-style-type: none"><li>- Improve diverse aspects of the drug prescription module to make it quicker and more user-friendly.</li></ul>                                                                                                                                                                                                                                                                                                                                                                                                                                                                                                     |
| <b>Agenda Module</b>                      |                                                                                                                                                                                                                                                                                                                                                                                                                                                                                                                                                                                                                                                          |
| Patient                                   | <ul style="list-style-type: none"><li>- Add photographs of drug packaging to identify it.</li></ul>                                                                                                                                                                                                                                                                                                                                                                                                                                                                                                                                                      |
| Provider                                  | <ul style="list-style-type: none"><li>- Change the main screen of the app to the Agenda directly. Change the main screen of the website to the Modules list.</li><li>- Modify the color of the icons to differentiate the distinct types of notification tasks.</li><li>- Include another type of reminder on the list: "tests" and "visits".</li></ul>                                                                                                                                                                                                                                                                                                  |
| <b>Patient-Centered Outcomes Module</b>   |                                                                                                                                                                                                                                                                                                                                                                                                                                                                                                                                                                                                                                                          |
| Patient                                   | <ul style="list-style-type: none"><li>- Include a function to monitor glycemia and temperature.</li><li>- Improve visualization of the rating of perceived physical exertion (using the Borg Scale).</li></ul>                                                                                                                                                                                                                                                                                                                                                                                                                                           |
| Provider                                  | <ul style="list-style-type: none"><li>- Modify the adherence graph for easier viewing of responses.</li><li>- Modify the patient-reported outcome data charts to include the average maximum and minimum for the time indicated.</li><li>- Modify the charts to automatically incorporate data corresponding to the last month.</li></ul>                                                                                                                                                                                                                                                                                                                |
| <b>Symptoms Module</b>                    |                                                                                                                                                                                                                                                                                                                                                                                                                                                                                                                                                                                                                                                          |
| Provider                                  | <ul style="list-style-type: none"><li>- Include email alerts related to extremely serious symptoms notified by patients via the platform and new courses of treatment included by the patient.</li><li>- Add "vomiting" as a very serious symptom.</li></ul>                                                                                                                                                                                                                                                                                                                                                                                             |
| <b>Health Education and Advice Module</b> |                                                                                                                                                                                                                                                                                                                                                                                                                                                                                                                                                                                                                                                          |

|                                                     |                                                                                                                                              |
|-----------------------------------------------------|----------------------------------------------------------------------------------------------------------------------------------------------|
| Patient                                             | - Provide post-transplant lifestyle and dietary recommendations.                                                                             |
| Provider                                            | - Add recommendations and advice using videos.                                                                                               |
| <b><i>Teleconsultation and Messaging Module</i></b> |                                                                                                                                              |
| Patient                                             | - Enable archives to be uploaded in messages.                                                                                                |
| Provider                                            | - Permit to send provider campaigns through the messaging system by text-messages in bulk to all patients or to a group of them via filters. |
